# Supplementary material
Source: HighWire-hosted journal article supplement (http://rc.rcjournal.com/highwire/filestream/11981/field_highwire_adjunct_files/0/suppl.pdf)

**E-Table 1.** Properties of the investigated catheters

| Type                                                         | Material Catheter/<br>Balloon | Length [cm] | Diameter OD/ID [mm] | Balloon Position | Balloon length/OD [mm] | max. volume [mL] |
|--------------------------------------------------------------|-------------------------------|-------------|---------------------|------------------|------------------------|------------------|
| Double-lumen-catheter (Bösch, Gottenheim, Germany)           | Polyurethane /Elastollan      | 130         | 2.35/2x0.9          | DBC              | 60/10                  | 4                |
| CooperSurgical (Leisegang Feinmechanik GmbH Berlin, Germany) | PTFE (PolyTetrafluoroEthylen) | 87          | N/A                 | SBC              | 100/x                  | 4                |
| nSpire, (ZAN, Oberthulba, Germany)                           | N/A                           | N/A         | N/A                 | DBC              | N/A                    | 4                |
| SmartCath 16 FR Adult, (VIASYS, Palm Springs, CA, USA)       | N/A                           | N/A         | N/A                 | SBC              | N/A                    | 6                |
| SmartCath 8 FR Adult, (VIASYS, Palm Springs, CA, USA)        | N/A                           | 103         | 3/                  | SBC              | 100/                   | 4                |
| NutriVent (SIDAM s.r.l., San Giacomo, Italy)                 | Polyurethane/ Polyethylene    | 110         | 4.7                 | DBC              | 100/15                 | 6                |

Table legend: N/A = not available/applicable, SBC = single balloon catheter, DBC = double balloon catheter. max. volume: filling volume according to Experiment I

### E-Figure1 - Detailed pressure volume curves of each balloon catheter system

**Supp. 1.** Pressure-volume relationship of Bösch DLC proximal balloon during dynamic (A, B) and static (C, D) inflation. A, C: static curves immediately after unpacking. B, D Inflation curves measured after experiments and 16 hours of balloon overdistension. Red: first, blue: second, black: following (third to sixth) inflation curves.

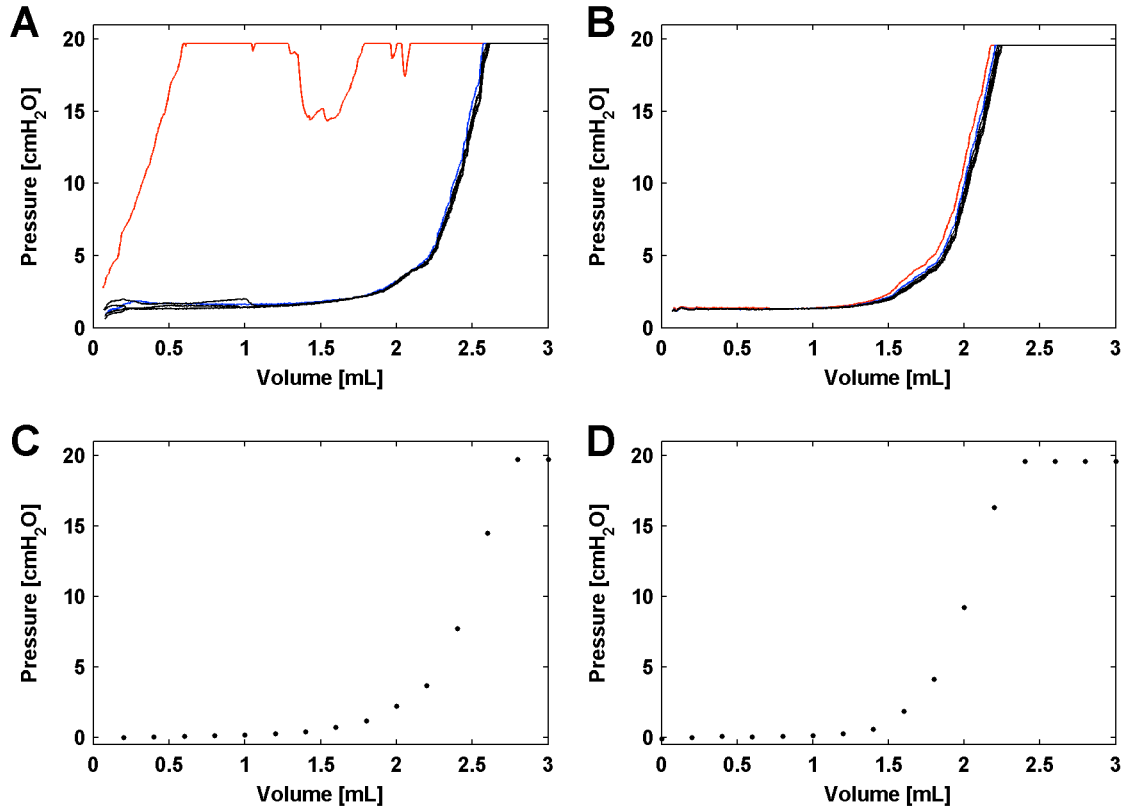

**Supp. 2.** Pressure-volume relationship of Bösch DLC distal balloon. For description please refer to legend of Supp. 1.

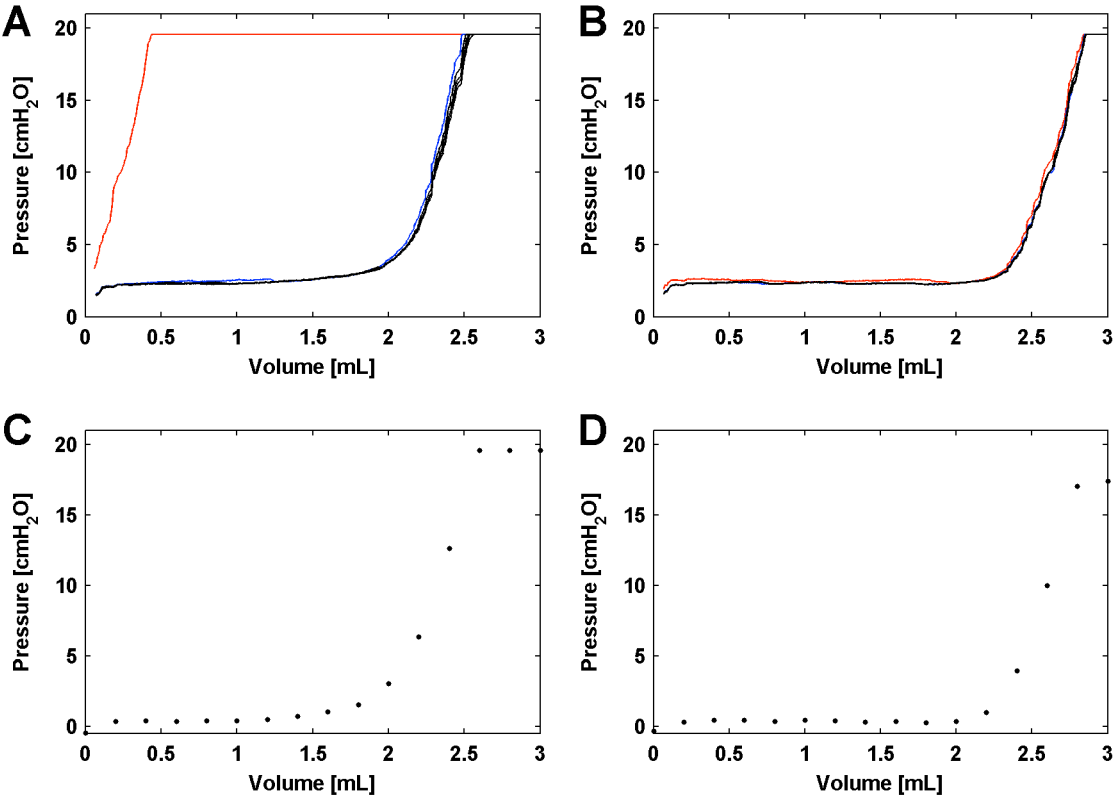

**Supp. 3.** Pressure-volume relationship of ZAN nSpire proximal balloon. For description please refer to legend of Supp. 1.

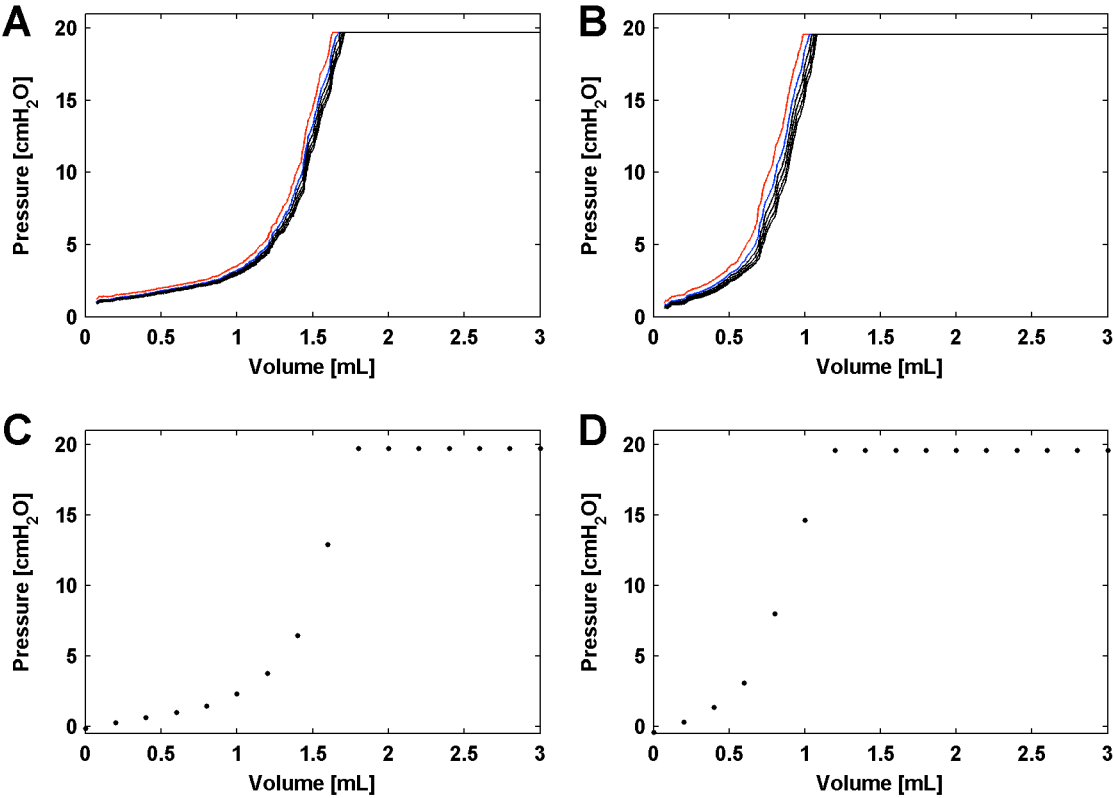

**Supp. 4.** Pressure-volume relationship of ZAN nSpire distal balloon. For description please refer to legend of Supp. 1.

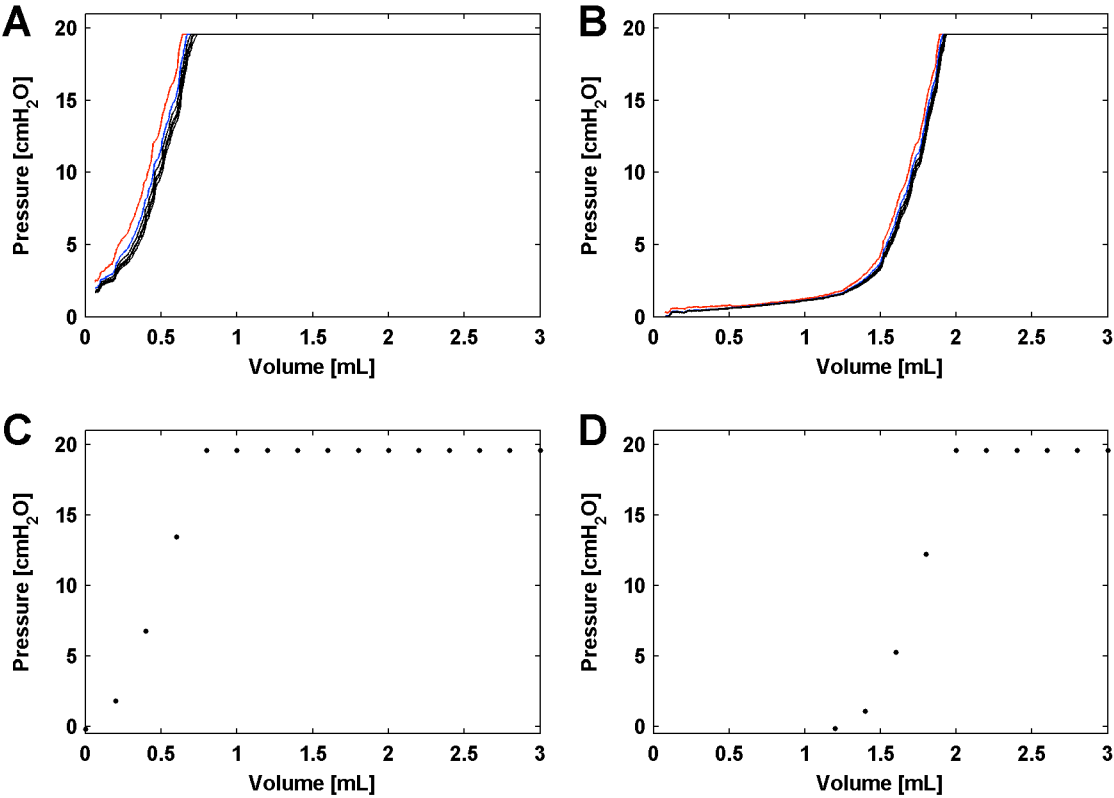

**Supp. 5.** Pressure-volume relationship of Nutrient proximal balloon. For description please refer to legend of Supp. 1.

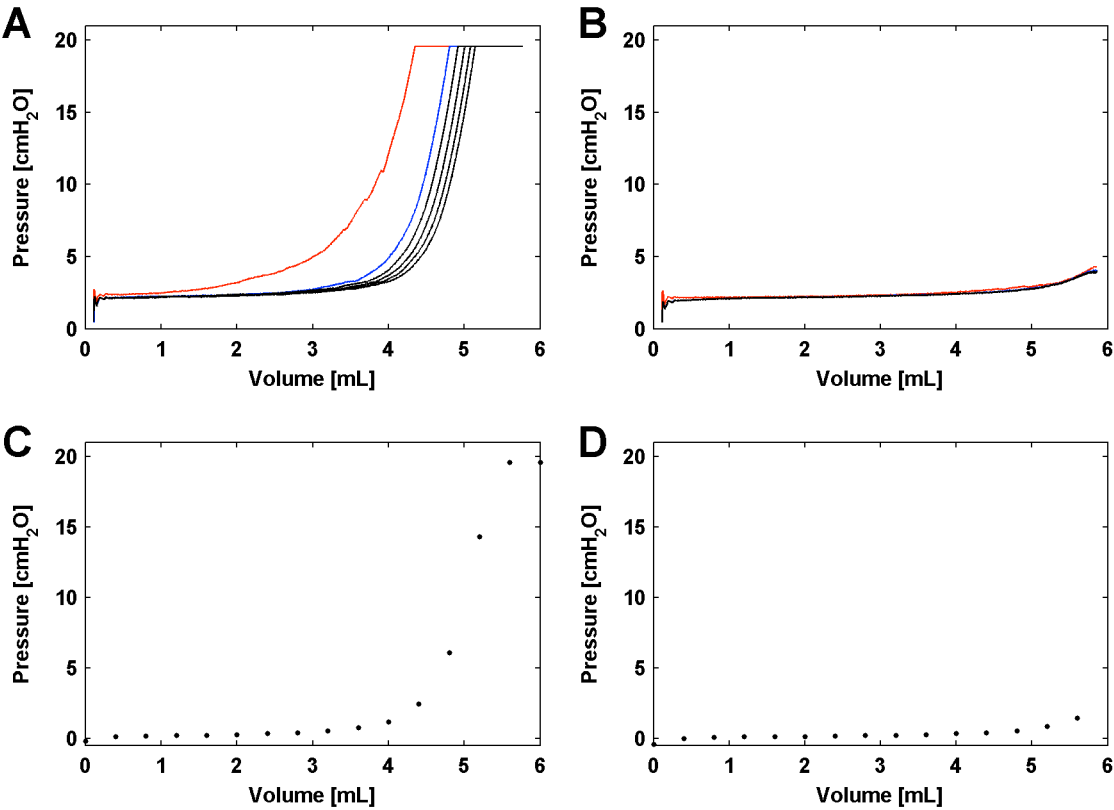

**Supp. 6.** Pressure-volume relationship of Nutrivent distal balloon. For description please refer to legend of Supp. 1.

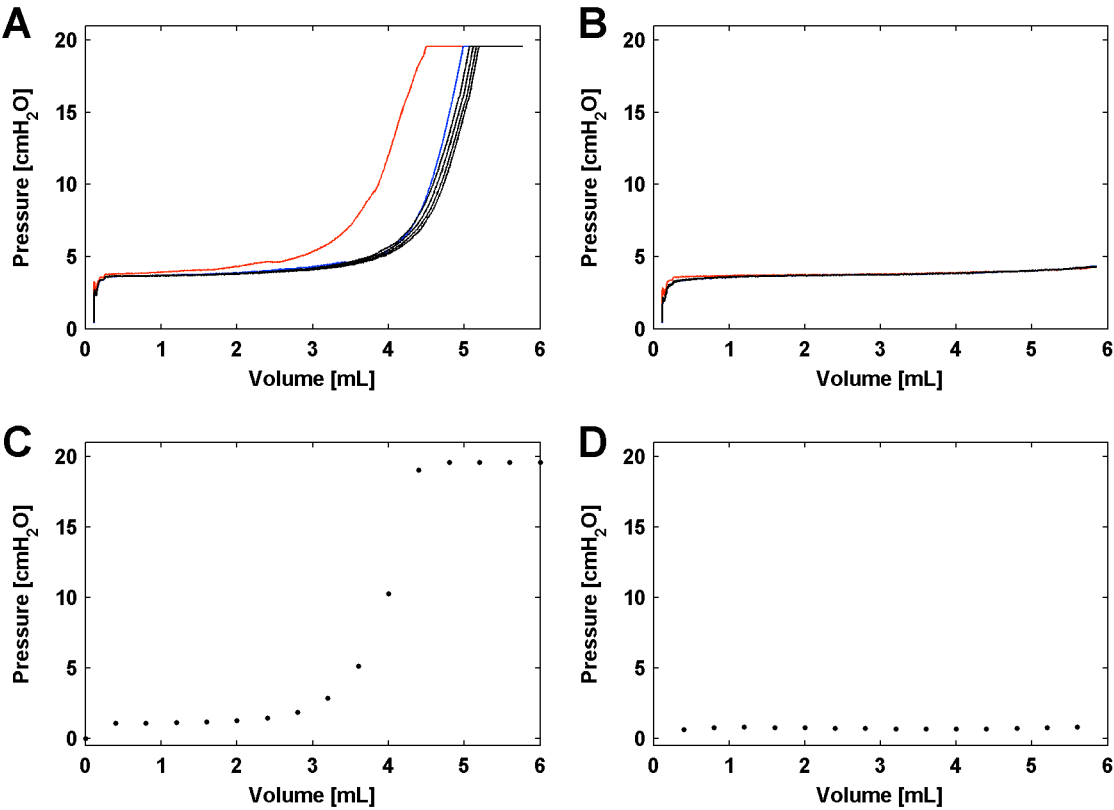

**Supp. 7.** Pressure-volume relationship of Copper Surgical balloon. For description please refer to legend of Supp. 1.

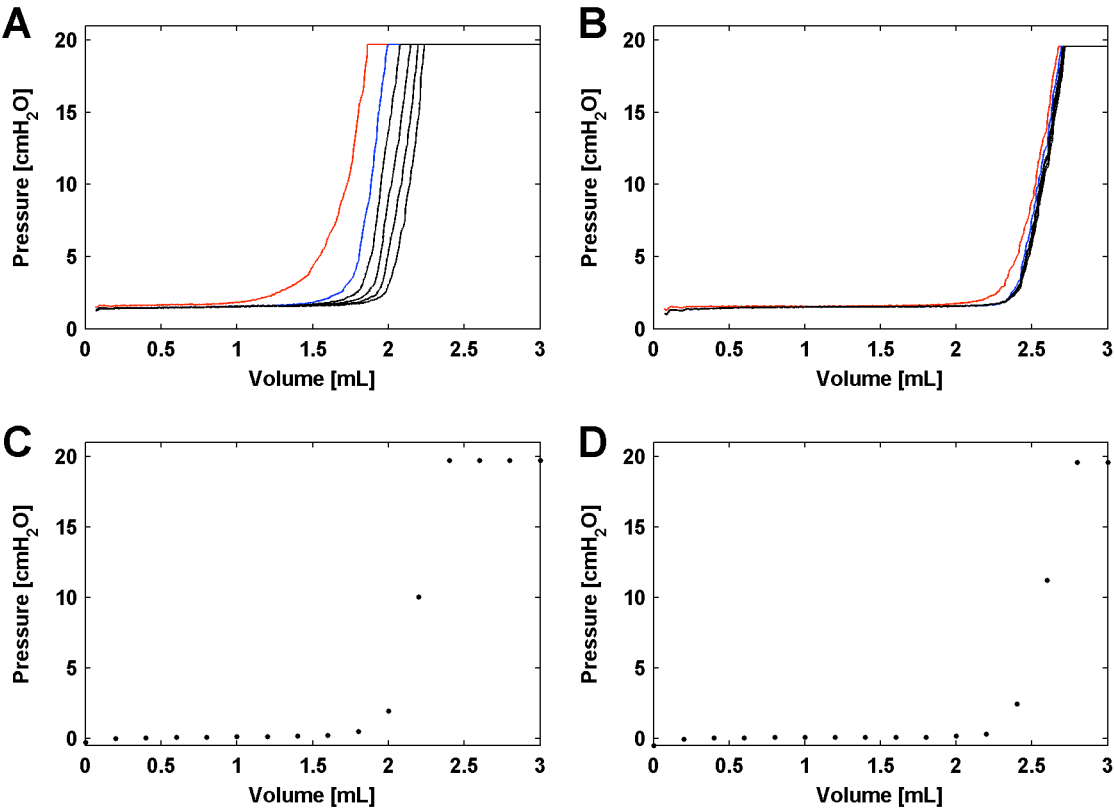



**Supp. 8.** Pressure-volume relationship of Viasys 16 FR balloon. For description please refer to legend of Supp. 1.

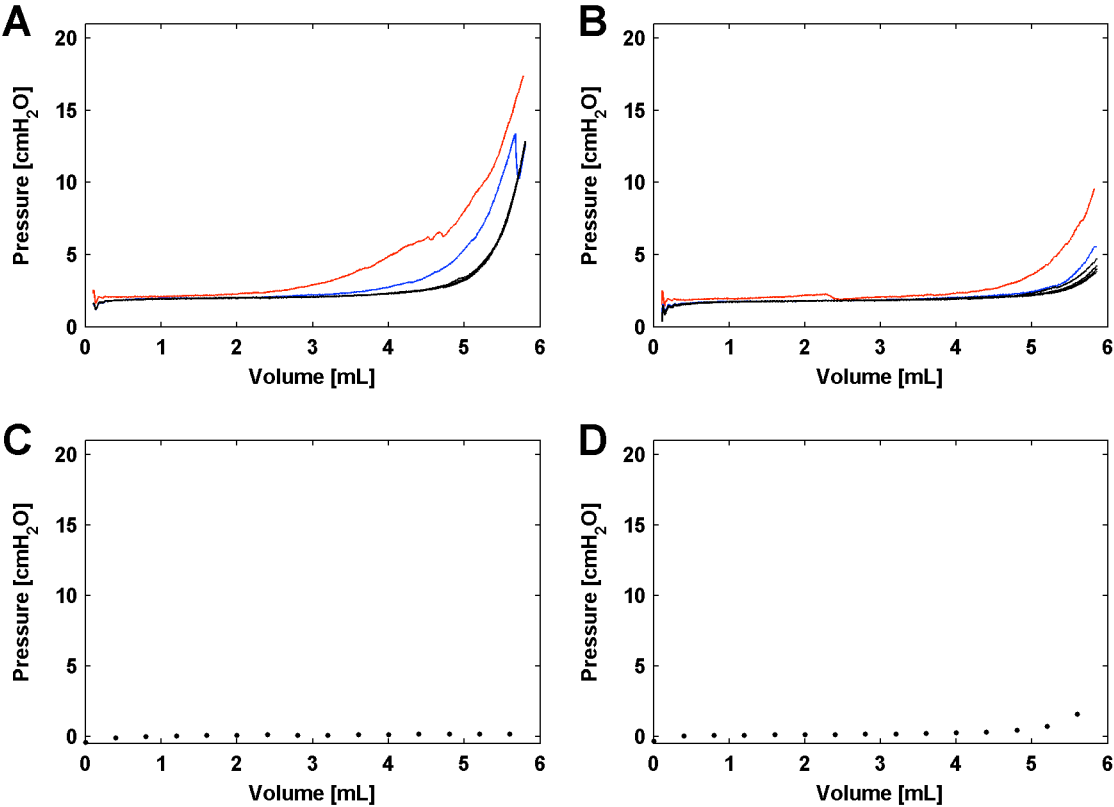

**Supp. 9.** Pressure-volume relationship of Viasys 8 FR balloon. For description please refer to legend of Supp. 1.

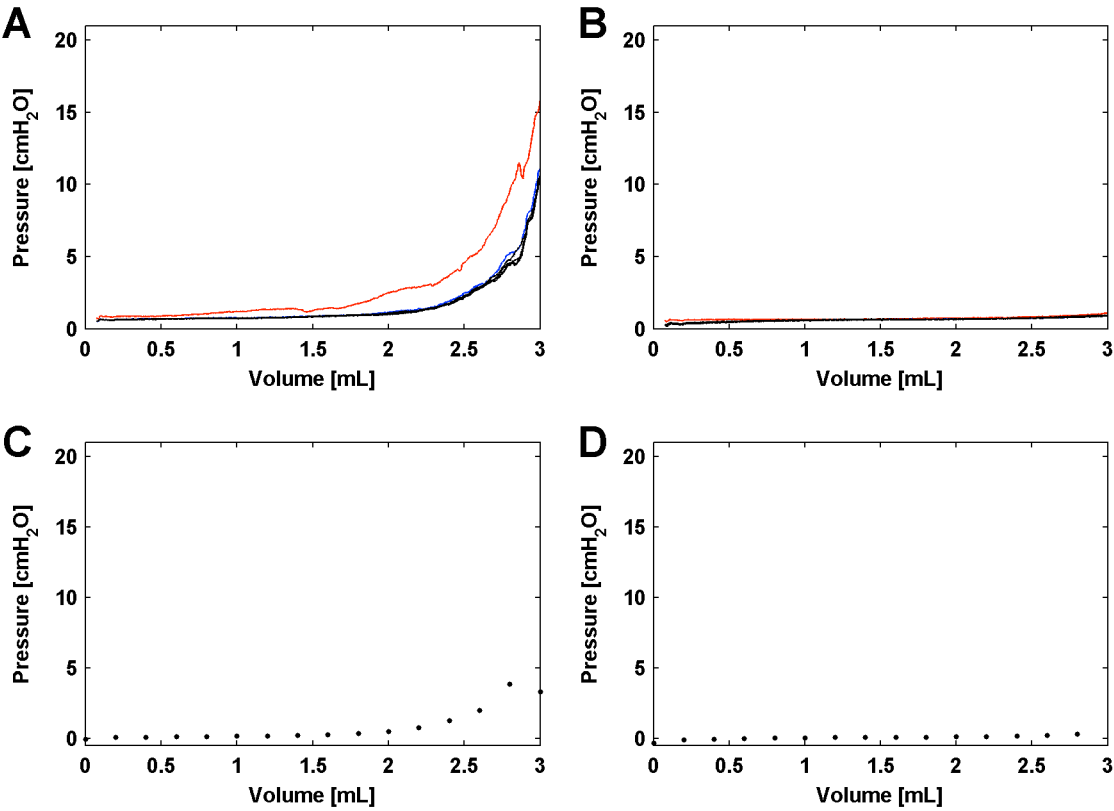

**Supp. 10.** Comparison of compliance measurements from ventilator (Evita 4, Dräger medical, Lübeck, Germany), direct pressure measurement and measurement via a pressure sensor and by pressure measurement via the distal balloon of Bösch DLT catheter at different levels of superimposed pressure (0 – 9 cmH<sub>2</sub>O). White bars: Compliance model of 86 mL/cmH<sub>2</sub>O. Grey bars: Compliance model of 62 mL/cmH<sub>2</sub>O, Black bars: Compliance model of 30 mL/cmH<sub>2</sub>O

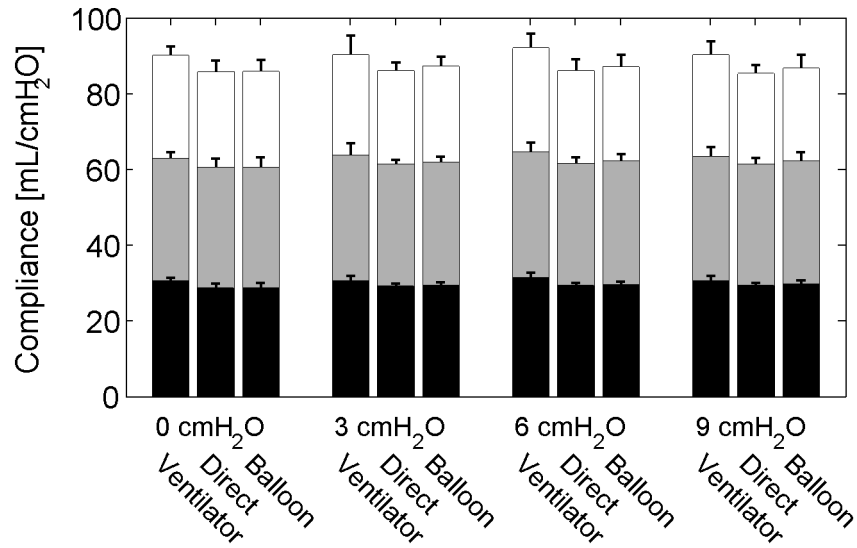

**Supp. 11.** Comparison of compliance measurements from ventilator, direct pressure measurement and measurement via the distal balloon of Bösch DLT catheter. For further description please refer to legend of Supp. 10.

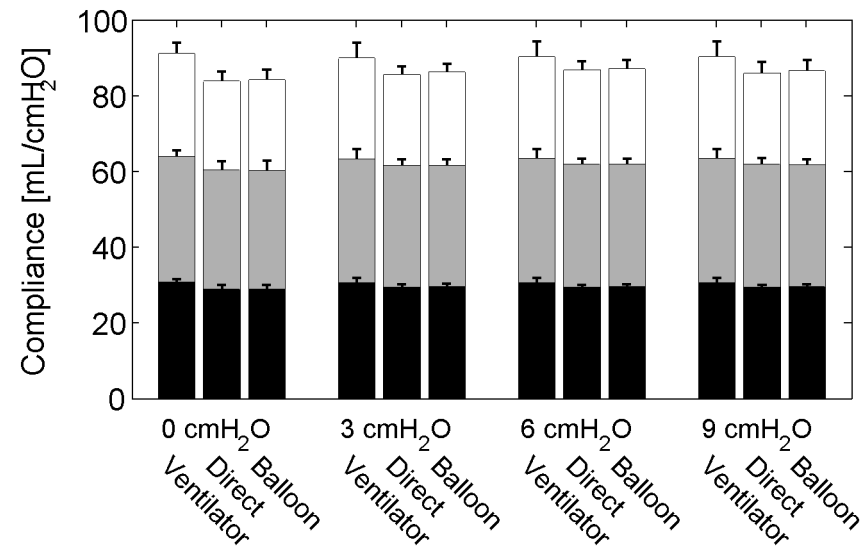

**Supp. 12.** Comparison of compliance measurements from ventilator, direct pressure measurement and measurement via the proximal balloon of ZAN nSpire catheter. For further description please refer to legend of Supp. 10.

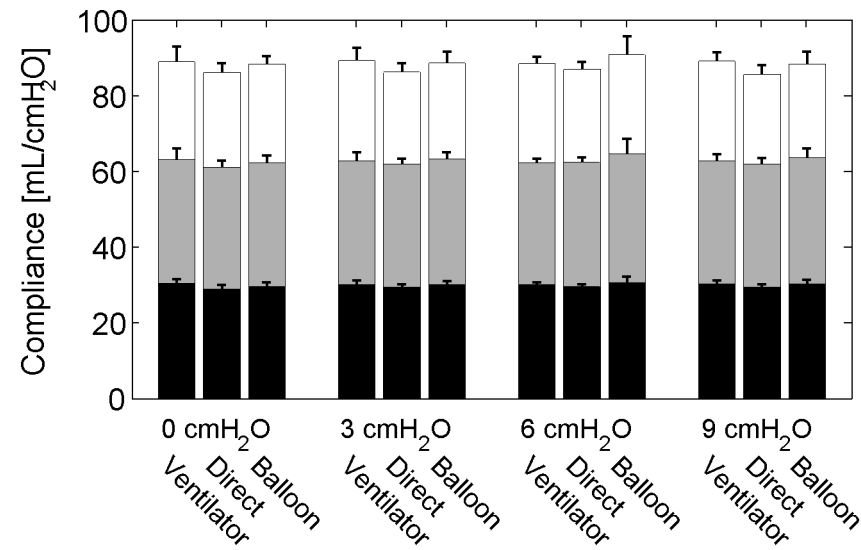

**Supp. 13:** Comparison of compliance measurements from ventilator, direct pressure measurement and measurement via the distal balloon of ZAN nSpire catheter. For further description please refer to legend of Supp. 10.

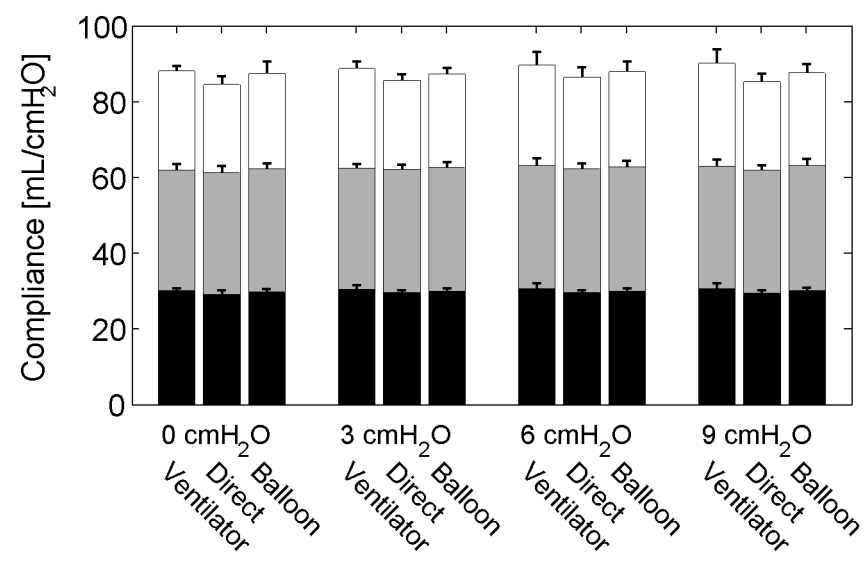

**Supp. 14:** Comparison of compliance measurements from ventilator, direct pressure measurement and measurement via the proximal balloon of Nutrivent catheter. For further description please refer to legend of Supp. 10.

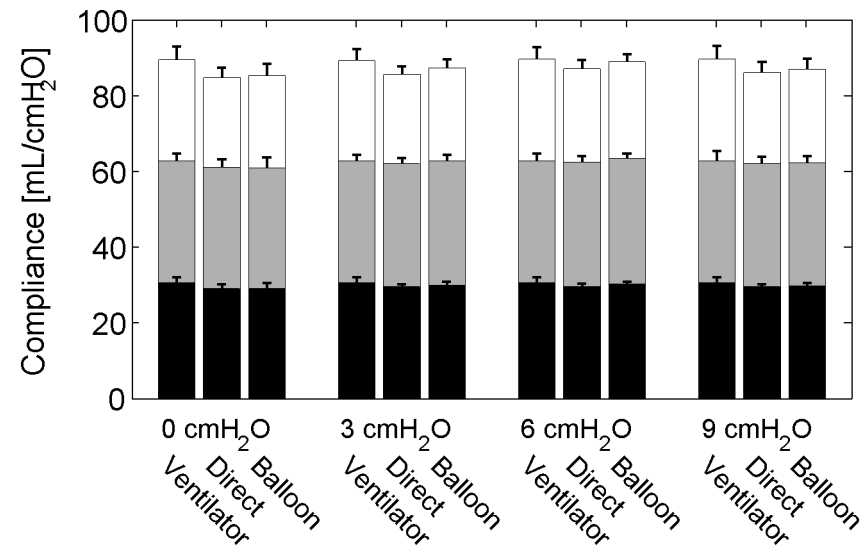

**Supp. 15:** Compliance determined via pressure measurement via the distal balloon of Nutrivent catheter. For further description please refer to legend of Supp. 10.

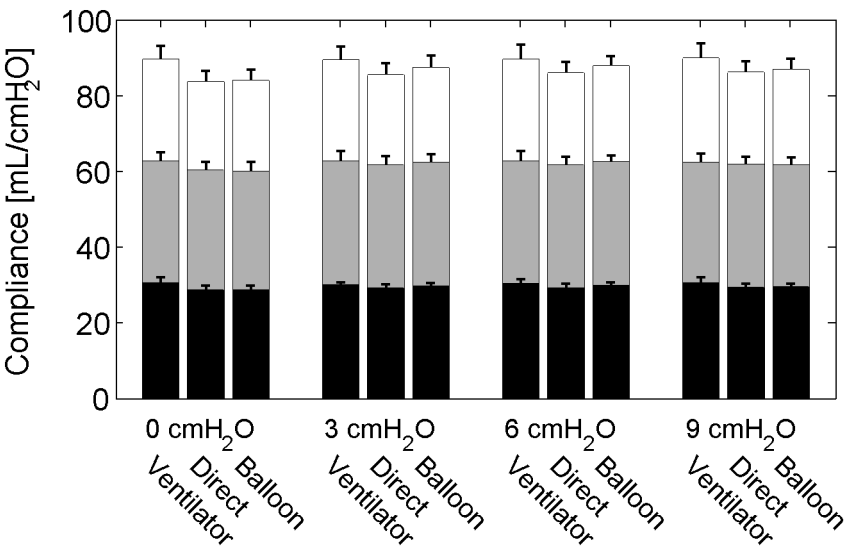



**Supp. 16:** Comparison of compliance measurements from ventilator, direct pressure measurement and measurement via the balloon of Copper Surgical catheter. For other description please refer to legend of Supp. 10.

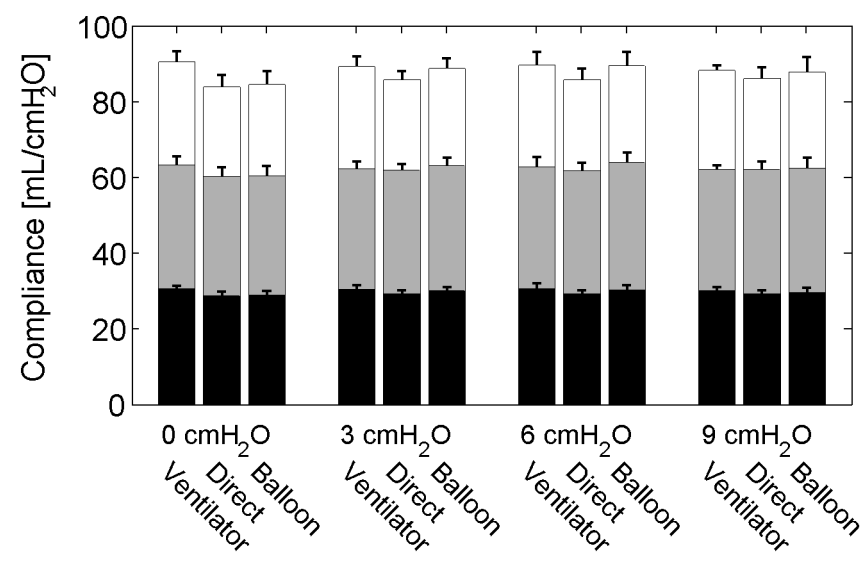

**Supp. 17:** Comparison of compliance measurements from ventilator, direct pressure measurement and measurement via the balloon of Viasys 16 FR catheter. For other description please refer to legend of Supp. 10.

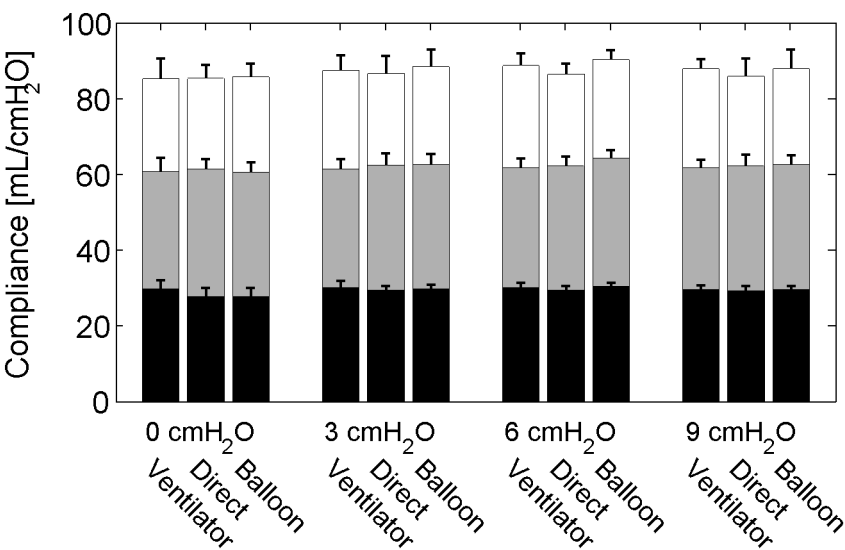

**Supp. 18:** Comparison of compliance measurements from ventilator, direct pressure measurement and measurement via the distal balloon of Viasys 8 FR catheter. For other description please refer to legend of Supp. 10.

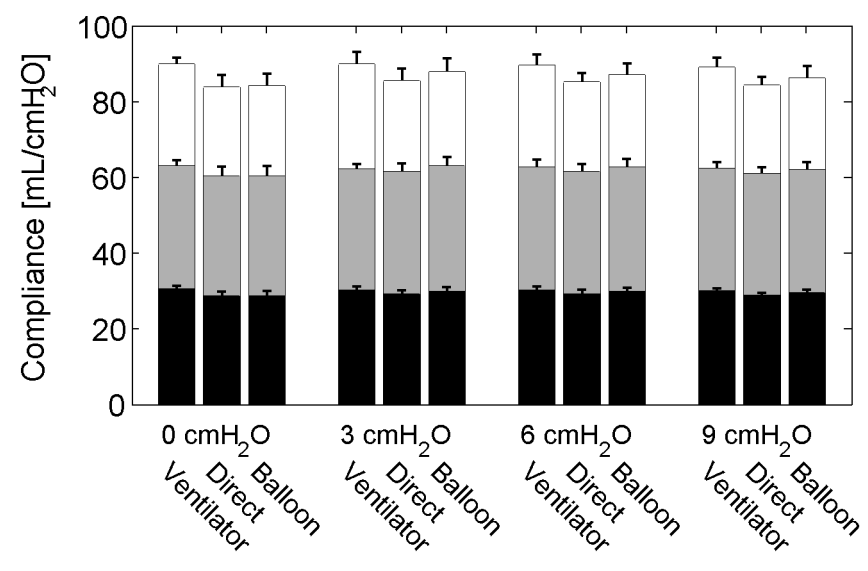

Supplement: suppl.pdf [file suppl.pdf]
